# Supplementary material
Source: PubMed Central journal article supplement (PMC5452039)
Supplement: EMBR-18-947-s001.pdf [file EMBR-18-947-s001.pdf]

# **Appendix material for: FKBP8 recruits LC3A to mediate Parkin-independent mitophagy**

## **Contents:**

|                           |     |
|---------------------------|-----|
| 1. Appendix Table S1..... | p.2 |
|---------------------------|-----|

## Appendix Table S1. Plasmids and oligonucleotides used in this study

### Gateway cloning vectors

| <u>Plasmid</u>      | <u>Description</u>                                               | <u>Source</u> |
|---------------------|------------------------------------------------------------------|---------------|
| pDest15             | bacterial GST fusion expression vector, T7 promoter              | Invitrogen    |
| pDEST-Myc           | mammalian Myc-tag fusion expression vector, CMV and T7 promoters | [1]           |
| pDest-3xFlag        | mammalian triple flag fusion expression vector, CMV              | [2]           |
| pDest-Cerulean-C1   | mammalian Cerulean fusion expression vector, CMV                 | this study    |
| pDest-EGFP-C1       | mammalian EGFP fusion expression vector, CMV                     | [1]           |
| pDest-EYFP-C1       | mammalian EYFP fusion expression vector, CMV                     | this study    |
| pDest-mCherry-C1    | mammalian mCherry fusion expression vector, CMV                  | [3]           |
| pDest-mCherry-EYFP- | mammalian mCherry-EYFP fusion expression vector,                 | this study    |
| pDest-EGFP-Flp-In-  | mammalian Flp-In expression vector, Tet inducible                | [4]           |
| pENTR1A, -2B, -3C   | gateway entry vectors                                            | Invitrogen    |

### Gateway entry clones (made by traditional subcloning or site-directed mutagenesis)

| <u>Plasmid</u>               | <u>Description</u>                                          | <u>Source</u> |
|------------------------------|-------------------------------------------------------------|---------------|
| pENTR-FKBP8                  | human FKBP8 in entry vector                                 | Imogene's     |
| pENTR-FKBP8 F24A/L26A        | point mutant of pENTR-FKBP8                                 | this study    |
| pENTR-FKBP8 N412K            | point mutant of pENTR-FKBP8                                 | This study    |
| pENTR-FKBP8 N412K/F24A/L26A  | point mutations of pENTR-FKBP8                              | This study    |
| pENTR-FKBP8 $\Delta$ TM      | Deletion of Transmembrane domain of                         | this study    |
| pENTR-FKBP8-Mito             | TM domain swapped with mitochondrial targeting sequence in  | this study    |
| pENTR-FKBP8-ER               | TM domain swapped with ER targeting sequence in pENTR-FKBP8 | this study    |
| pENTR-BNIP3                  | human BNIP3 in entry clone                                  | this study    |
| pENTR-NIX                    | human NIX in entry clone                                    | [5]           |
| pENTR-OMP25-TM (109-145)     | Transmembrane domain of human OMP25 cloned in ENTRY vector  | This study    |
| pDONOR221-OMP25-TM (109-145) | Transmembrane domain of human OMP25 cloned in DONOR vector  | this study    |
| pENTR-LC3A                   | human LC3A in entry vector                                  | [3]           |
| pENTR-LC3A F52A              | Point mutation of LC3A                                      | this study    |
| pENTR-LC3B                   | human LC3B in entry vector                                  | [3]           |
| pENTR-LC3B D19A/F52A         | Point mutation of LC3B                                      | this study    |
| pENTR-LC3B F52A/L53A         | Point mutation of LC3B                                      | this study    |
| pENTR-LC3B F52A/F108A        | Point mutation of LC3B                                      | this study    |
| pENTR-LC3B F108A             | Point mutation of LC3B                                      | this study    |
| pENTR-LC3C                   | human LC3C in entry vector                                  | [3]           |
| pENTR-GABARAP                | human GABARAP in entry vector                               | [3]           |
| pENTR-GABARAP-L1             | human GABARAP-L1 in entry vector                            | [3]           |
| pENTR-GABARAP-L2             | human GABARAP-L2 in entry vector                            | [3]           |

### Gateway expression clones (made by Gateway LR reactions)

| <u>Plasmid</u>                         | <u>Description</u>                                                | <u>Source</u> |
|----------------------------------------|-------------------------------------------------------------------|---------------|
| pDest-Myc-FKBP8                        | Myc-tag expression of FKBP8                                       | this study    |
| pDest-Myc-FKBP8                        | Myc-tag expression of FKBP8 LIR mutant                            | this study    |
| pDest-Cerulean-FKBP8                   | Cerulean fluorescent expression of FKBP8                          | this study    |
| pDest-Cerulean-FKBP8 F24A/L27A         | Cerulean fluorescent expression of FKBP8 LIR mut                  | this study    |
| pDest-EGFP-FKBP8                       | EGFP fluorescent expression of FKBP8                              | this study    |
| pDest-EGFP-FKBP8- $\Delta$ TM          | EGFP fluorescent expression of FKBP8                              | this study    |
| pDest-EGFP-FKBP8-Mito                  | EGFP fluorescent expression of FKBP8 on                           | this study    |
| pDest-EGFP-FKBP8-ER                    | EGFP fluorescent expression of FKBP8 on ER                        | this study    |
| pDest-mCherry- FKBP8                   | mCherry fluorescent expression of FKBP8                           | this study    |
| pDest-mCherry-FKBP8F24A/L27A F24A/L27A | mCherry fluorescent expression of FKBP8 LIR mutant                | this study    |
| pDest-mCherry-EYFP-FKBP8               | mCherry-EYFP fluorescent expression of                            | this study    |
| pDest-Cerulean-FKBP8 N412K             | Cerulean fluorescent expression of FKBP8 N412K                    | this study    |
| pDest-Cerulean-FKBP8 N412K/F24A/L26A   | Cerulean fluorescent expression of FKBP8 N412K/F24A/L26A          | this study    |
| pDest-3xFlag-FKBP8                     | FLAG-tag expression of FKBP8                                      | this study    |
| pDest-3xFlag-FKBP8                     | FLAG-tag expression of FKBP8 LIR mutant                           | this study    |
| pDest-Myc-BNIP3                        | Myc-tag expression of BNIP3                                       | this study    |
| pDest-Cerulean-BNIP3                   | Cerulean fluorescent expression of BNIP3                          | this study    |
| pDest-mCherry-BNIP3                    | mCherry-fluorescent expression of BNIP3                           | this study    |
| pDest-Myc-NIX                          | Myc-tag expression of NIX                                         | this study    |
| pDest-Cerulean-NIX                     | Cerulean fluorescent expression of NIX                            | this study    |
| pDest-mCherry-NIX                      | mCherry-fluorescent expression of NIX                             | this study    |
| pDest-mCherry-EYFP-OMP25-TM            | expression vector for mCherry-EYFP fusion with TM domain of OMP25 | this study    |
| pDest-mCherry-OMP25-TM                 | mCherry-fluorescent expression of OMP25-TM                        | this study    |
| pDest15-LC3A                           | GST-LC3A fusion protein expression                                | [3]           |
| pDest15-LC3B                           | GST-LC3B fusion protein expression                                | [3]           |
| pDest15-LC3C                           | GST-LC3C fusion protein expression                                | [3]           |
| pDest15-GABARAP                        | GST-GABARAP fusion protein expression                             | [3]           |
| pDest15-GABARAP-L1                     | GST-GABARAP-L1 fusion protein                                     | [3]           |
| pDest15-GABARAP-L2                     | GST-GABARAP-L2 fusion protein                                     | [3]           |
| pDest-3XFlag-LC3A                      | FLAG-tag expression of LC3A                                       | this study    |
| pDest-3XFlag-LC3B                      | FLAG-tag expression of LC3B                                       | this study    |
| pDest-3XFlag-GABARAP-L1                | FLAG-tag expression of GABARAP-L1                                 | this study    |
| pDest-EYFP-LC3A                        | EYFP fluorescent expression of LC3A                               | this study    |
| pDest-EGFP-Flp-In-LC3A                 | For stable inducible EGFP fluorescent                             | this study    |

### Other vectors

| <u>Plasmid</u> | <u>Description</u>                            | <u>Source</u> |
|----------------|-----------------------------------------------|---------------|
| pGEX4T-3       | bacterial GST fusion expression vector, tac   | Amersham      |
| dsRed2-Mito    | mammalian expression vector for mitochondrial | Clontech      |

|                       |                                                              |         |
|-----------------------|--------------------------------------------------------------|---------|
| ssEGFP-KDEL           | Mammalian EGFP fusion vector for an ER                       | [6]     |
| mCherry-EGFP-OMP25-TM | expression vector for mCherry-EGFP fusion with mitochondrial | [7]     |
| pSpCas9(BB)-2A-Puro   | gRNA construct for CRISPR/Cas9 system                        | Addgene |
| pGEMT-easy            | Cloning of PCR products from KO cells                        | Promega |

#### Selected oligonucleotides used in this study

| Oligonucleotide description                                                      | 5'-3' oligonucleotide sequence                                                                                    |
|----------------------------------------------------------------------------------|-------------------------------------------------------------------------------------------------------------------|
| Mitochondria targeting of FKBP8                                                  | CTGATCCTGGCCATGCTGGCCATCGGCCTGTTTCAGCCTGGG<br>CGCCTTCATCAAGATCATCCAGCTGAGGAAGAACAAC                               |
| ER targeting of FKBP8                                                            | ATCACCACCGTGGAGAGCAACAGCAGCTGGTGGACCAACT<br>GGGTGATCCCCGCCATCAGCGCCCTGGTGGTGGCCCTGATG<br>TACAGGCTGTACATGGCCGAGGAC |
| CRISPR guide RNA-Forward                                                         | CACCGGTTGTCCCATGTCCTCCAG                                                                                          |
| CRISPR guide RNA-Reverse                                                         | AAACCTGGAGGACATGGGACAACC                                                                                          |
| Amplification of genomic DNA exon 2 of FKBP8 for CRISPR KO verification -Forward | GTAAGTGGATGGGGTTGAGGAT                                                                                            |
| Amplification of genomic DNA exon 2 of FKBP8 for CRISPR KO verification -Reverse | CTTTGCTCCTTACCCAGAATGT                                                                                            |

## REFERENCES

- Lamark T, Perander M, Outzen H, Kristiansen K, Øvervatn A, Michaelsen E, Bjørkøy G, Johansen T (2003) Interaction codes within the family of mammalian Phox and Bem1p domain-containing proteins. *J Biol Chem* **278**: 34568-34581
- Jain A, Lamark T, Sjøttem E, Bowitz Larsen K, Awuh JA, Øvervatn A, McMahon M, Hayes JD, Johansen T (2010) p62/SQSTM1 is a target gene for transcription factor NRF2 and creates a positive feedback loop by inducing antioxidant response element-driven gene transcription. *J Biol Chem* **285**: 22576-22591
- Pankiv S, Clausen TH, Lamark T, Brech A, Bruun JA, Outzen H, Overvatn A, Bjorkoy G, Johansen T (2007) p62/SQSTM1 binds directly to Atg8/LC3 to facilitate degradation of ubiquitinated protein aggregates by autophagy. *J Biol Chem* **282**: 24131-24145
- Alemu EA, Lamark T, Torgersen KM, Birgisdottir AB, Larsen KB, Jain A, Olsvik H, Overvatn A, Kirkin V, Johansen T (2012) ATG8 Family Proteins Act as Scaffolds for Assembly of the ULK Complex: SEQUENCE REQUIREMENTS FOR LC3-INTERACTING REGION (LIR) MOTIFS. *J Biol Chem* **287**: 39275-39290
- Novak I, Kirkin V, McEwan DG, Zhang J, Wild P, Rozenknop A, Rogov V, Lohr F, Popovic D, Occhipinti A, *et al.* (2010) Nix is a selective autophagy receptor for mitochondrial clearance. *EMBO Rep* **11**: 45-51
- Puhka M, Vihinen H, Joensuu M, Jokitalo E (2007) Endoplasmic reticulum remains continuous and undergoes sheet-to-tubule transformation during cell division in mammalian cells. *J Cell Biol* **179**: 895-909
- Wang Y, Serricchio M, Jauregui M, Shanbhag R, Stoltz T, Di Paolo CT, Kim PK, McQuibban GA (2015) Deubiquitinating enzymes regulate PARK2-mediated mitophagy. *Autophagy* **11**: 595-606
